# Supplementary material
Source: publisher site journal article supplement (https://www.spandidos-publications.com/2343/downloadSupplementary)

Figure S1. Identification of alveolar type 2 epithelial cells using immunofluorescence staining. (A and B) Representative photomicrographs of cultured alveolar type2 epithelial cells (A) magnification, x200 and (B) magnification, x400. (C-E) and (F-H) photomicrographs of immunofluorescence staining targeting LAMP and ABCA3, respectively, which are classical biochemical hallmarks of AT2 cells.

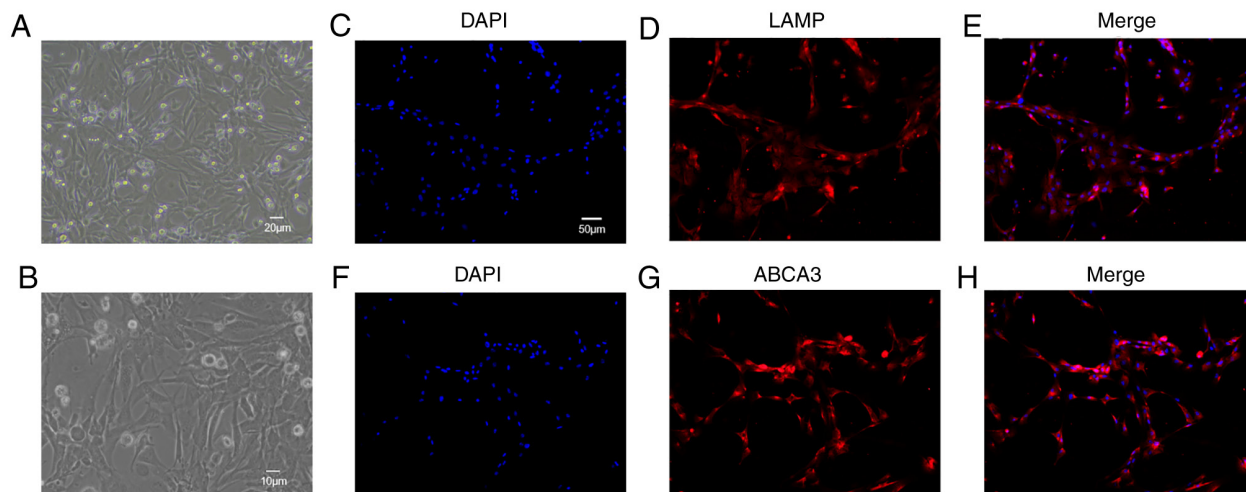

Supplement: Supplementary file 1 [file downloadSupplementary]
